# Supplementary material for: Theranostic fluorescent silica encapsulated magnetic nanoassemblies for in vitro MRI imaging and hyperthermia
Source: Royal Society of Chemistry journal article supplement (doi:10.1039/c5ra07632c), 2015-01-01
Supplement: c5ra07632c1.pdf [file c5ra07632c1.pdf]

## Supporting information's:

# Theranostics fluorescent silica encapsulated magnetic nanoassemblies for *in-vitro* MRI imaging and hyperthermia

Sunil Kumar<sup>a</sup>, Amita Daverey<sup>b,c</sup>, Vahid Khalilzad-Sharghi<sup>d</sup>, Niroj K. Sahu<sup>b</sup>, Srivatsan Kidambi<sup>c</sup>, Shadi F. Othman<sup>d</sup> and Dharendra Bahadur<sup>b\*</sup>

<sup>a</sup>Department of Chemical Engineering <sup>b</sup>Department of Metallurgical Engineering and Materials Science, Indian Institute of Technology Mumbai-400076, India. <sup>c</sup>Department of Chemical and Biomolecular Engineering, <sup>d</sup>Department of Biological Systems Engineering, University of Nebraska, Lincoln, NE-68588. USA. \*E-mail: dhirenb@iitb.ac.in Tel: +91 22 25767632, Fax: +91 22 2576 3480.

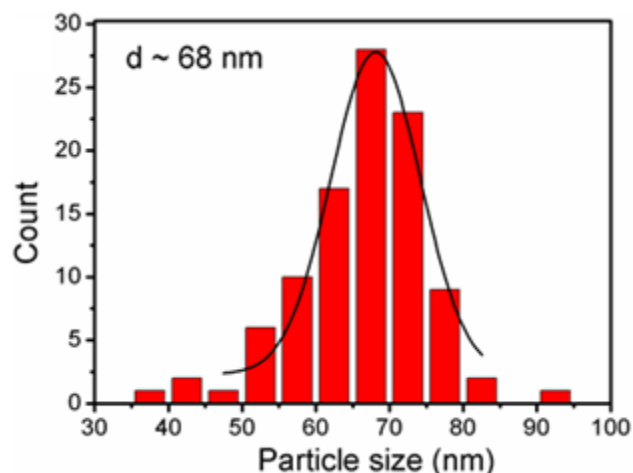

**S.I. Figure 1.** Respective particle size distributions of MNAs@Dye-SiO<sub>2</sub>@SiO<sub>2</sub>

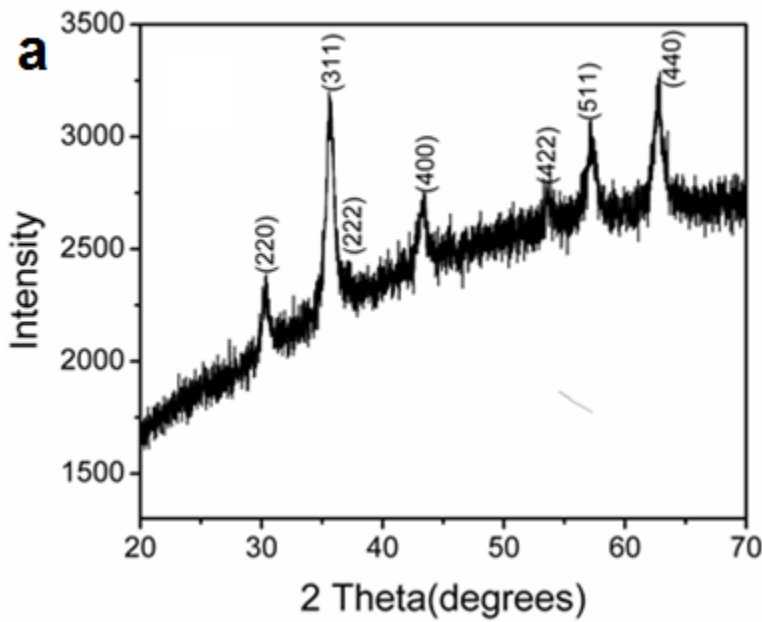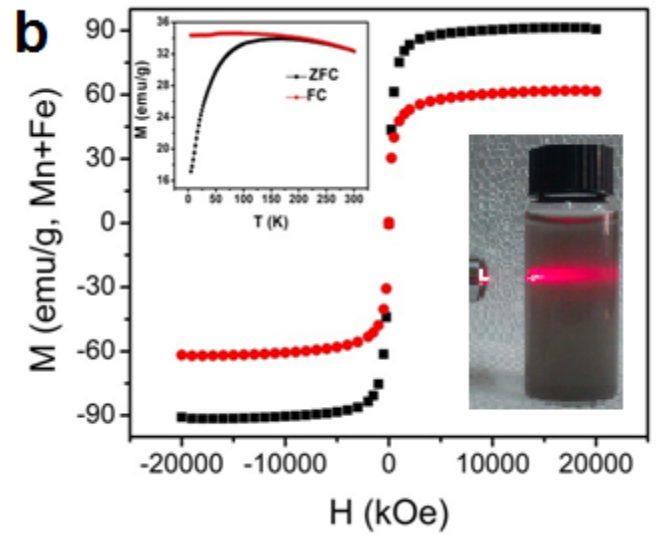

S.I. Figure 2. a) XRD patterns of as-

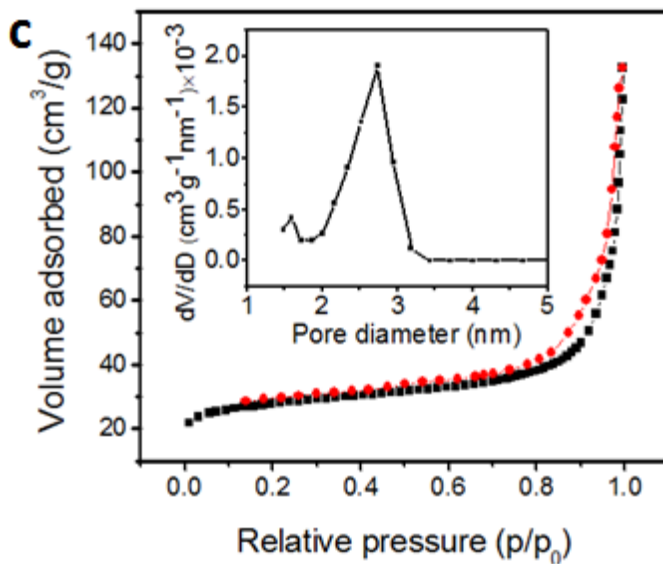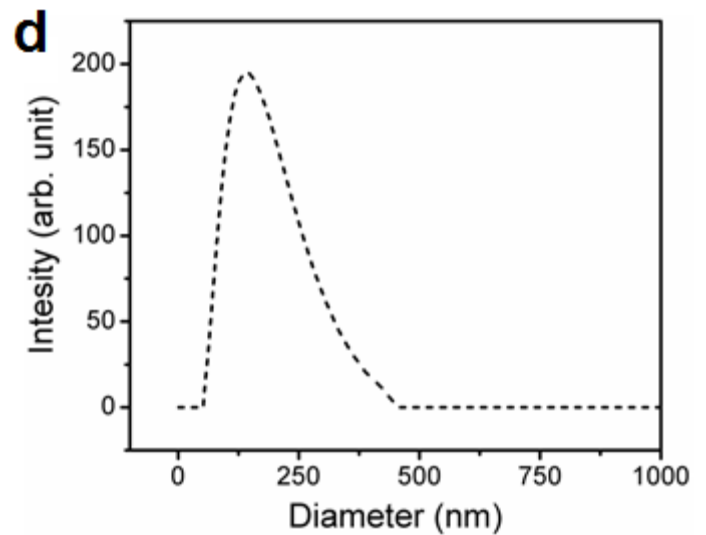

synthesized MNAs. b)  $M$  versus  $H$  plots of

MNAs. The ZFC-FC plot of MNAs is shown in the inset. c) Nitrogen adsorption/desorption isotherm of as-synthesized MNAs@Dye-SiO<sub>2</sub>@SiO<sub>2</sub>. The inset of (c) shows the pore size distribution. The square (■) and circle (●) symbols indicate adsorption and desorption branches. d) DLS data of MNAs@Dye-SiO<sub>2</sub>@SiO<sub>2</sub>.

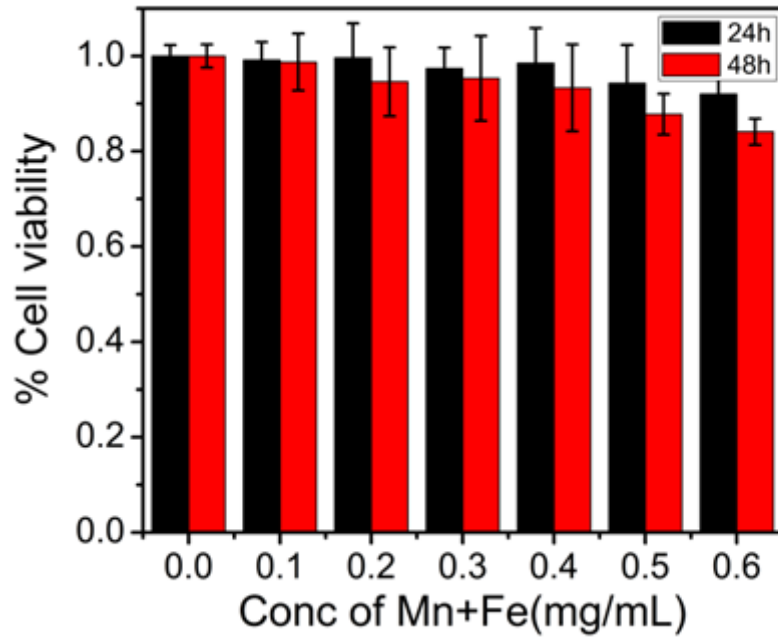

**S.I Figure. 3.** *In-vitro* cytotoxicity test of MNAs@Dye-SiO<sub>2</sub>@SiO<sub>2</sub>. The viability of the HeLa cells was determined by MTT assay after incubation with various concentration of MNAs@Dye-SiO<sub>2</sub>@SiO<sub>2</sub> for 24 and 48 h of time period (= 3).

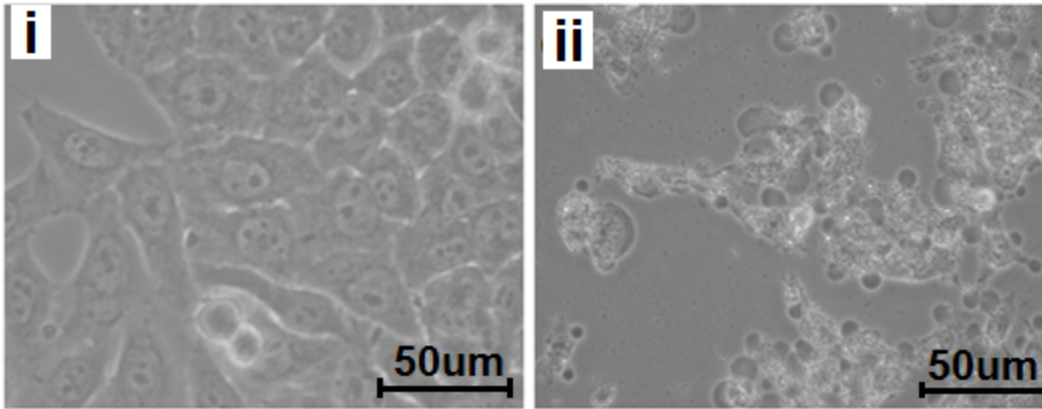

**S.I Figure. 4.**i)Phase contrast image of control HeLa cells ii) MHT treated HeLa cells.
